# Supplementary material for: Tackling the Challenges of Graft Healing After Anterior Cruciate Ligament Reconstruction—Thinking From the Endpoint
Source: Front Bioeng Biotechnol. 2021 Dec 22;9:756930. doi: 10.3389/fbioe.2021.756930 (PMC8727521; doi:10.3389/fbioe.2021.756930)
Supplement: Supplementary file 1 [file DataSheet2.docx]

**Supplementary information 2.** Search strategy for articles examining the efficacy of biological therapies in the promotion of graft healing.

A systematic search of the PubMed database using the keywords (ACLR OR ACL reconstruction OR anterior cruciate ligament reconstruction) AND (growth factor OR PRP OR cell) was done on 15th Oct 2021.

The following inclusion and exclusion criteria are adopted.

Inclusion criteria:

1. Original human / animal studies of ACLR using a free tendon graft; and
2. Studies on the effectiveness of biological therapies including growth factor, cell on graft healing, graft laxity, knee stability or knee function after ACLR.

Exclusion criteria:

1. *In vitro* studies, *ex vivo* studies, cadaveric studies; review articles, technical notes, editorial comments;
2. Studies on ACLR using an allograft;
3. Studies not assessing graft healing after ACLR (e.g., post-ACLR osteoarthritis); and
4. Studies examining the effects of non-biological interventions including chemicals, biophysical interventions, implants, metal ions or biomaterial scaffold-only interventions

The search resulted in 373 studies. 63 original articles were identified after a preliminary screening of the article titles and abstracts and 49 articles were selected after a more detailed read of the articles.
